# Supplementary material for: Physical Activity Level, Barriers, and Facilitators for Exercise Engagement for Chronic Community-Dwelling Stroke Survivors in Low-Income Settings: A Cross-Sectional Study in Benin
Source: MDPI journal article supplement (doi:10.3390/ijerph20031784), 2023-01-18
Supplement: s1 [file s1]

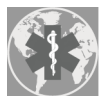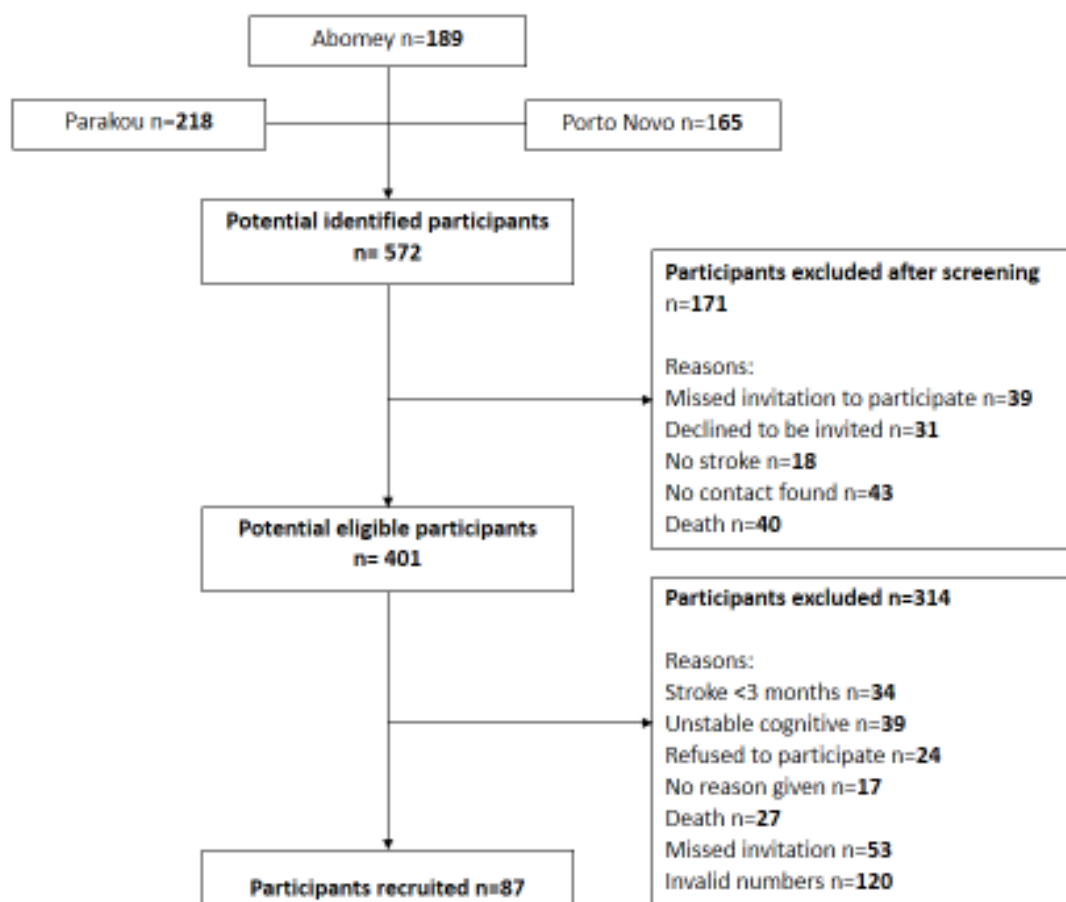

**Supplementary Figure S1:** Flow chart for participants' selection

**Supplementary Table S1.** Participant's PA level per domains and category

| PA Domains            | N  | Vigorous PA (%) | Moderate PA (%) | Walking PA (%) | Moderate indoor PA (%) |
|-----------------------|----|-----------------|-----------------|----------------|------------------------|
| Work                  | 21 | 21.9            | 55.3            | 22.8           | NA                     |
| Active Transportation | 62 | 0.0             | 8.0             | 92.0           | NA                     |
| Domestic Domain       | 35 | 3.5             | 56.4            | 0.0            | 40.1                   |
| Leisure Domain        | 41 | 23.9            | 13.2            | 62.9           | NA                     |

**Supplementary Table S2:** Total of time (minutes) and day per dominate category

| PA Domains                                    | N  | Total min | Total day | Mean min | Mean day |
|-----------------------------------------------|----|-----------|-----------|----------|----------|
| Work (Moderate PA)                            | 13 | 1165      | 65        | 89.6     | 5.0      |
| Active Transportation (Walking)               | 61 | 2340      | 295       | 38.4     | 4.8      |
| Domestic and gardening (Moderate yard chores) | 15 | 2190      | 87        | 146.0    | 5.8      |
| Leisure (Walking)                             | 27 | 1615      | 145       | 59.8     | 5.4      |
